# Supplementary material for: Dihydromyricetin attenuates neuropathic pain via enhancing the transition from M1 to M2 phenotype polarization by potentially elevating ALDH2 activity in vitro and vivo
Source: PubMed Central journal article supplement — Ann Transl Med. 2020 Sep;8(18):1151. doi: 10.21037/atm-20-5838 (PMC7576025; doi:10.21037/atm-20-5838), 2020-09
Supplement: atm-08-18-1151-dss.pdf [file atm-08-18-1151-dss.pdf]

## Data Sharing Statement

|                     |                                                                                                                                                    |                                                                                                                                                                                                                                                                                                        |
|---------------------|----------------------------------------------------------------------------------------------------------------------------------------------------|--------------------------------------------------------------------------------------------------------------------------------------------------------------------------------------------------------------------------------------------------------------------------------------------------------|
| <b>Article Info</b> | <a href="http://dx.doi.org/10.21037/atm-20-5838">http://dx.doi.org/10.21037/atm-20-5838</a>                                                        |                                                                                                                                                                                                                                                                                                        |
| <b>Item</b>         | <b>Question</b>                                                                                                                                    | <b>Authors' Response<br/>(place "-" if not applicable)</b>                                                                                                                                                                                                                                             |
| 1                   | Would you like to share data collected for your study to others?                                                                                   | Yes.                                                                                                                                                                                                                                                                                                   |
| 2                   | If not, would you like to share the reason for your decision?                                                                                      | -                                                                                                                                                                                                                                                                                                      |
| 3                   | What data in particular will be shared?                                                                                                            | All data related the study.                                                                                                                                                                                                                                                                            |
| 4                   | Any other documents will be share? Such as study protocol, statistical analysis plan, informed consent form, clinical study report, analytic code. | Statistical analysis plan, informed consent form, and clinical study report will also be shared if requested.                                                                                                                                                                                          |
| 5                   | When will data availability begin?                                                                                                                 | From the publication date.                                                                                                                                                                                                                                                                             |
| 6                   | When will data availability end?                                                                                                                   | Two years within the publication date, since the technique or survival date may be updated over time.                                                                                                                                                                                                  |
| 7                   | To whom will you share the data?                                                                                                                   | To all scientist.                                                                                                                                                                                                                                                                                      |
| 8                   | For what type of analysis or purpose?                                                                                                              | The results were analyzed via SPSS 11.0 and GraphPad version 6.0 software. All the data are presented as mean $\pm$ standard deviation (SD). One-way analysis of variance (ANOVA) with Tukey's multiple test was used for comparison between groups. A P value <0.05 indicated significant difference. |
| 9                   | How or where can the data/documents be obtained?                                                                                                   | Emails could be sent to the address below to obtain the shared data: E-mail: f_w@jlu.edu.cn                                                                                                                                                                                                            |
| 10                  | Any other restrictions?                                                                                                                            | No.                                                                                                                                                                                                                                                                                                    |
